# Supplementary material for: Differences in protein expression, at the basal state and at 2 h of insulin infusion, in muscle biopsies from healthy Arab men with high or low insulin sensitivity measured by hyperinsulinemic euglycemic clamp
Source: Front Endocrinol (Lausanne). 2023 Feb 17;13:1024832. doi: 10.3389/fendo.2022.1024832 (PMC9982120; doi:10.3389/fendo.2022.1024832)
Supplement: Supplementary file 6 [file Table_6.xlsx]

## Sheet: BC_HIS_Proteins Unique
Gene symbol	Protein name
HSPE1	heat shock protein family E
ATP5J	ATP synthase, H+ transporting, mitochondrial Fo complex subunit F6
ENDOD1	endonuclease domain containing 1
DDAH2	dimethylarginine dimethylaminohydrolase 2
RPL31	ribosomal protein L31
GNPDA1	glucosamine-6-phosphate deaminase 1
ATPIF1	ATPase inhibitory factor 1
CAND1	cullin associated and neddylation dissociated 1
RPL38	ribosomal protein L38
UBQLN2	ubiquilin 2
COA3	cytochrome c oxidase assembly factor 3
IPO7	importin 7
HLA-C	major histocompatibility complex, class I, C
PITRM1	pitrilysin metallopeptidase 1
NOL3	nucleolar protein 3
SLC25A6	solute carrier family 25 member 6
YBX1	Y-box binding protein 1
PLGRKT	plasminogen receptor with a C-terminal lysine
SGCA	sarcoglycan alpha
RPS3A	ribosomal protein S3A
CECR5	cat eye syndrome chromosome region, candidate 5
ESYT1	extended synaptotagmin 1
COX5B	cytochrome c oxidase subunit 5B
ABHD10	abhydrolase domain containing 10
CAPN2	calpain 2
GPS1	G protein pathway suppressor 1
RPS9	ribosomal protein S9
BDH2	3-hydroxybutyrate dehydrogenase, type 2
RPS17	ribosomal protein S17
DNM1L	dynamin 1 like
HDDC2	HD domain containing 2
ISCA2	iron-sulfur cluster assembly 2
LAMP2	lysosomal associated membrane protein 2
TXNDC17	thioredoxin domain containing 17
RPS21	ribosomal protein S21
HMGCL	3-hydroxymethyl-3-methylglutaryl-CoA lyase
PFDN5	prefoldin subunit 5
PSMD12	proteasome 26S subunit, non-ATPase 12
RPS25	ribosomal protein S25
DBI	diazepam binding inhibitor, acyl-CoA binding protein
PSMD13	proteasome 26S subunit, non-ATPase 13
NDUFA6	NADH:ubiquinone oxidoreductase subunit A6
IDH3G	isocitrate dehydrogenase 3
IDI1	isopentenyl-diphosphate delta isomerase 1
APOL1	apolipoprotein L1
ACY1	aminoacylase 1
PPIC	peptidylprolyl isomerase C
TRDN	triadin
NFU1	NFU1 iron-sulfur cluster scaffold
NT5C	5', 3'-nucleotidase, cytosolic
LETM1	leucine zipper and EF-hand containing transmembrane protein 1
DDOST	dolichyl-diphosphooligosaccharide--protein glycosyltransferase non-catalytic subunit
SDR39U1	short chain dehydrogenase/reductase family 39U member 1
RYR1	ryanodine receptor 1
PDXK	pyridoxal
LGALS3	galectin 3
DDX3X	DEAD-box helicase 3, X-linked
VAMP3	vesicle associated membrane protein 3
MTPN	myotrophin
COQ10A	coenzyme Q10A
TBCB	tubulin folding cofactor B
ADK	adenosine kinase
CUTC	cutC copper transporter
CBR4	carbonyl reductase 4
S100A6	S100 calcium binding protein A6
PSMD6	proteasome 26S subunit, non-ATPase 6
S100A9	S100 calcium binding protein A9
CRYM	crystallin mu
COA6	cytochrome c oxidase assembly factor 6
TIMM13	translocase of inner mitochondrial membrane 13
GANAB	glucosidase II alpha subunit
CSE1L	chromosome segregation 1 like
MTX2	metaxin 2
YKT6	YKT6 v-SNARE homolog
CLIC5	chloride intracellular channel 5
PTGR1	prostaglandin reductase 1
SLC25A13	solute carrier family 25 member 13
PIN4	peptidylprolyl cis/trans isomerase, NIMA-interacting 4
GLRX	glutaredoxin
PPA2	pyrophosphatase
CPNE3	copine 3
PKIA	protein kinase
PGLS	6-phosphogluconolactonase
PYGB	phosphorylase, glycogen; brain
TMED9	transmembrane p24 trafficking protein 9
UQCC1	ubiquinol-cytochrome c reductase complex assembly factor 1
NIT1	nitrilase 1
KIF5B	kinesin family member 5B
UQCRH	ubiquinol-cytochrome c reductase hinge protein
TMEM143	transmembrane protein 143
UROD	uroporphyrinogen decarboxylase
FAHD1	fumarylacetoacetate hydrolase domain containing 1
RAB21	RAB21, member RAS oncogene family
ATP5S	ATP synthase, H+ transporting, mitochondrial Fo complex subunit s
SLIRP	SRA stem-loop interacting RNA binding protein
ENDOG	endonuclease G
HBQ1	hemoglobin subunit theta 1
SNRPD2	small nuclear ribonucleoprotein D2 polypeptide
RAB5A	RAB5A, member RAS oncogene family
MRRF	mitochondrial ribosome recycling factor
SNX12	sorting nexin 12
SH3BGRL3	SH3 domain binding glutamate rich protein like 3
VBP1	VHL binding protein 1
STOML2	stomatin like 2
MT-CYB	Cytochrome b
C7orf55	Protein FMC1 homolog
MT-ATP6	ATP synthase subunit a

## Sheet: gProfiler_Basal_LIS vs HIS
source	term_name	term_id	adjusted_p_value	negative_log10_of_adjusted_p_value	term_size	query_size	intersection_size	effective_domain_size	intersections
GO:BP	establishment of localization in cell	GO:0051649	7.79206e-08	7.10835	2778	101	43	18123	PSMD13,SNX12,DDOST,DDX3X,HLA-C,PITRM1,YKT6,RPS3A,PDXK,NOL3,RPS17,PSMD12,DNM1L,CPNE3,ENDOD1,LETM1,IPO7,MT-ATP6,S100A9,PYGB,SLC25A6,LAMP2,LGALS3,ATP5J,RAB5A,RYR1,KIF5B,RPS9,CSE1L,PKIA,SNRPD2,RPS25,RPL31,RPL38,RPS21,TRDN,PSMD6,VAMP3,CAND1,TMED9,STOML2,RAB21,TIMM13
GO:BP	generation of precursor metabolites and energy	GO:0006091	1.94653e-06	5.71074	545	101	18	18123	NDUFA6,IDH3G,COQ10A,PGLS,MT-CYB,MT-ATP6,UQCRH,COX5B,PYGB,ATP5J,GLRX,HMGCL,GNPDA1,COA6,FAHD1,BDH2,SLC25A13,STOML2
GO:BP	transport	GO:0006810	2.76374e-06	5.5585	5214	101	58	18123	PSMD13,SNX12,DDOST,DDX3X,HLA-C,PITRM1,YKT6,MTX2,RPS3A,PDXK,NOL3,RPS17,PSMD12,DNM1L,APOL1,CPNE3,ENDOD1,LETM1,IPO7,MT-CYB,MT-ATP6,S100A9,S100A6,DBI,HBQ1,COX5B,PYGB,SLC25A6,LAMP2,LGALS3,ATP5J,RAB5A,RYR1,KIF5B,GLRX,RPS9,CSE1L,PKIA,SNRPD2,RPS25,RPL31,RPL38,RPS21,YBX1,TRDN,CRYM,PSMD6,VAMP3,CAND1,ESYT1,TMED9,CUTC,CLIC5,UBQLN2,SLC25A13,STOML2,RAB21,TIMM13
GO:BP	establishment of localization	GO:0051234	8.87778e-06	5.0517	5364	101	58	18123	PSMD13,SNX12,DDOST,DDX3X,HLA-C,PITRM1,YKT6,MTX2,RPS3A,PDXK,NOL3,RPS17,PSMD12,DNM1L,APOL1,CPNE3,ENDOD1,LETM1,IPO7,MT-CYB,MT-ATP6,S100A9,S100A6,DBI,HBQ1,COX5B,PYGB,SLC25A6,LAMP2,LGALS3,ATP5J,RAB5A,RYR1,KIF5B,GLRX,RPS9,CSE1L,PKIA,SNRPD2,RPS25,RPL31,RPL38,RPS21,YBX1,TRDN,CRYM,PSMD6,VAMP3,CAND1,ESYT1,TMED9,CUTC,CLIC5,UBQLN2,SLC25A13,STOML2,RAB21,TIMM13
GO:BP	cellular localization	GO:0051641	1.25439e-05	4.90157	3519	101	45	18123	PSMD13,SNX12,DDOST,DDX3X,HLA-C,PITRM1,YKT6,RPS3A,PDXK,NOL3,RPS17,PSMD12,DNM1L,CPNE3,ENDOD1,LETM1,IPO7,MT-ATP6,S100A9,PYGB,SLC25A6,LAMP2,LGALS3,ATP5J,RAB5A,RYR1,KIF5B,RPS9,CSE1L,PKIA,SNRPD2,RPS25,RPL31,RPL38,RPS21,YBX1,TRDN,PSMD6,VAMP3,CAND1,ESYT1,TMED9,STOML2,RAB21,TIMM13
GO:BP	cellular respiration	GO:0045333	1.60505e-05	4.79451	240	101	12	18123	NDUFA6,IDH3G,COQ10A,MT-CYB,MT-ATP6,UQCRH,COX5B,ATP5J,COA6,FAHD1,SLC25A13,STOML2
GO:BP	energy derivation by oxidation of organic compounds	GO:0015980	7.34575e-05	4.13396	334	101	13	18123	NDUFA6,IDH3G,COQ10A,MT-CYB,MT-ATP6,UQCRH,COX5B,PYGB,ATP5J,COA6,FAHD1,SLC25A13,STOML2
GO:BP	aerobic respiration	GO:0009060	0.000296363	3.52818	200	101	10	18123	NDUFA6,IDH3G,MT-CYB,MT-ATP6,UQCRH,COX5B,ATP5J,COA6,FAHD1,STOML2
GO:BP	exocytosis	GO:0006887	0.000908028	3.0419	906	101	19	18123	PSMD13,DDOST,DDX3X,HLA-C,YKT6,PDXK,PSMD12,DNM1L,CPNE3,ENDOD1,S100A9,PYGB,LAMP2,LGALS3,RAB5A,PSMD6,VAMP3,CAND1,RAB21
GO:BP	mitochondrion organization	GO:0007005	0.00091832	3.03701	565	101	15	18123	NDUFA6,PITRM1,UQCC1,MTX2,NOL3,DNM1L,LETM1,MT-ATP6,SLC25A6,ATP5J,HMGCL,SLIRP,STOML2,COA3,TIMM13
GO:BP	SRP-dependent cotranslational protein targeting to membrane	GO:0006614	0.00185341	2.73203	96	101	7	18123	RPS3A,RPS17,RPS9,RPS25,RPL31,RPL38,RPS21
GO:BP	establishment of protein localization to organelle	GO:0072594	0.00206781	2.68449	523	101	14	18123	PITRM1,RPS3A,RPS17,IPO7,SLC25A6,LAMP2,RPS9,CSE1L,PKIA,RPS25,RPL31,RPL38,RPS21,TIMM13
GO:BP	regulated exocytosis	GO:0045055	0.00276542	2.55824	790	101	17	18123	PSMD13,DDOST,DDX3X,HLA-C,PDXK,PSMD12,DNM1L,CPNE3,ENDOD1,S100A9,PYGB,LAMP2,LGALS3,RAB5A,PSMD6,VAMP3,CAND1
GO:BP	cotranslational protein targeting to membrane	GO:0006613	0.00279441	2.55371	102	101	7	18123	RPS3A,RPS17,RPS9,RPS25,RPL31,RPL38,RPS21
GO:BP	organonitrogen compound metabolic process	GO:1901564	0.00294167	2.53141	6904	101	62	18123	PSMD13,SNX12,DDOST,DDX3X,ACY1,UROD,ADK,PITRM1,YKT6,GPS1,RPS3A,PDXK,NOL3,RPS17,PFDN5,PSMD12,APOL1,CPNE3,IPO7,DDAH2,MT-ATP6,S100A9,DBI,LAMP2,CAPN2,LGALS3,ATP5J,RAB5A,GLRX,HMGCL,PPIC,RPS9,GNPDA1,MTPN,HSPE1,VBP1,PKIA,RPS25,RPL31,RPL38,RPS21,YBX1,GANAB,CRYM,PSMD6,ISCA2,CAND1,CBR4,NT5C,MRRF,ESYT1,BDH2,PPA2,PLGRKT,ABHD10,CLIC5,UBQLN2,SLC25A13,STOML2,NFU1,PIN4,COA3
GO:BP	cellular nitrogen compound catabolic process	GO:0044270	0.00311008	2.50723	623	101	15	18123	PSMD13,RPS3A,RPS17,PSMD12,RPS9,RPS25,RPL31,RPL38,RPS21,YBX1,ENDOG,PSMD6,NIT1,NT5C,SLIRP
GO:BP	intracellular transport	GO:0046907	0.00313448	2.50383	1723	101	26	18123	SNX12,PITRM1,YKT6,RPS3A,RPS17,DNM1L,IPO7,MT-ATP6,SLC25A6,LAMP2,ATP5J,RAB5A,KIF5B,RPS9,CSE1L,PKIA,SNRPD2,RPS25,RPL31,RPL38,RPS21,VAMP3,TMED9,STOML2,RAB21,TIMM13
GO:BP	oxidative phosphorylation	GO:0006119	0.00349161	2.45697	151	101	8	18123	NDUFA6,MT-CYB,MT-ATP6,UQCRH,COX5B,ATP5J,COA6,STOML2
GO:BP	neutrophil degranulation	GO:0043312	0.00484242	2.31494	483	101	13	18123	PSMD13,DDOST,DDX3X,HLA-C,PDXK,PSMD12,CPNE3,S100A9,PYGB,LAMP2,LGALS3,PSMD6,CAND1
GO:BP	protein targeting to ER	GO:0045047	0.00493367	2.30683	111	101	7	18123	RPS3A,RPS17,RPS9,RPS25,RPL31,RPL38,RPS21
GO:BP	neutrophil activation involved in immune response	GO:0002283	0.00542007	2.266	488	101	13	18123	PSMD13,DDOST,DDX3X,HLA-C,PDXK,PSMD12,CPNE3,S100A9,PYGB,LAMP2,LGALS3,PSMD6,CAND1
GO:BP	nucleobase-containing compound catabolic process	GO:0034655	0.00600202	2.2217	573	101	14	18123	PSMD13,RPS3A,RPS17,PSMD12,RPS9,RPS25,RPL31,RPL38,RPS21,YBX1,ENDOG,PSMD6,NT5C,SLIRP
GO:BP	establishment of protein localization to endoplasmic reticulum	GO:0072599	0.00625007	2.20412	115	101	7	18123	RPS3A,RPS17,RPS9,RPS25,RPL31,RPL38,RPS21
GO:BP	neutrophil mediated immunity	GO:0002446	0.00706329	2.15099	500	101	13	18123	PSMD13,DDOST,DDX3X,HLA-C,PDXK,PSMD12,CPNE3,S100A9,PYGB,LAMP2,LGALS3,PSMD6,CAND1
GO:BP	neutrophil activation	GO:0042119	0.00737642	2.13215	502	101	13	18123	PSMD13,DDOST,DDX3X,HLA-C,PDXK,PSMD12,CPNE3,S100A9,PYGB,LAMP2,LGALS3,PSMD6,CAND1
GO:BP	mitochondrial transport	GO:0006839	0.00765717	2.11593	286	101	10	18123	PITRM1,MTX2,NOL3,LETM1,MT-ATP6,SLC25A6,ATP5J,SLC25A13,STOML2,TIMM13
GO:BP	RNA catabolic process	GO:0006401	0.00853678	2.06871	431	101	12	18123	PSMD13,RPS3A,RPS17,PSMD12,RPS9,RPS25,RPL31,RPL38,RPS21,YBX1,PSMD6,SLIRP
GO:BP	granulocyte activation	GO:0036230	0.00857155	2.06694	509	101	13	18123	PSMD13,DDOST,DDX3X,HLA-C,PDXK,PSMD12,CPNE3,S100A9,PYGB,LAMP2,LGALS3,PSMD6,CAND1
Pathways of neurodegeneration diseases	nuclear-transcribed mRNA catabolic process, nonsense-mediated decay	GO:0000184	0.00977075	2.01007	123	101	7	18123	RPS3A,RPS17,RPS9,RPS25,RPL31,RPL38,RPS21
GO:BP	viral gene expression	GO:0019080	0.012174	1.91457	237	101	9	18123	DDOST,RPS3A,RPS17,RPS9,RPS25,RPL31,RPL38,RPS21,GANAB
GO:BP	heterocycle catabolic process	GO:0046700	0.0139912	1.85415	617	101	14	18123	PSMD13,RPS3A,RPS17,PSMD12,RPS9,RPS25,RPL31,RPL38,RPS21,YBX1,ENDOG,PSMD6,NT5C,SLIRP
GO:BP	intracellular protein transport	GO:0006886	0.014986	1.82431	995	101	18	18123	PITRM1,RPS3A,RPS17,IPO7,SLC25A6,LAMP2,RAB5A,KIF5B,RPS9,CSE1L,PKIA,RPS25,RPL31,RPL38,RPS21,TMED9,RAB21,TIMM13
GO:BP	leukocyte degranulation	GO:0043299	0.0155556	1.80811	538	101	13	18123	PSMD13,DDOST,DDX3X,HLA-C,PDXK,PSMD12,CPNE3,S100A9,PYGB,LAMP2,LGALS3,PSMD6,CAND1
GO:BP	mRNA catabolic process	GO:0006402	0.0183615	1.73609	388	101	11	18123	PSMD13,RPS3A,RPS17,PSMD12,RPS9,RPS25,RPL31,RPL38,RPS21,YBX1,PSMD6
GO:BP	ATP metabolic process	GO:0046034	0.0188826	1.72394	317	101	10	18123	NDUFA6,DNM1L,MT-CYB,MT-ATP6,UQCRH,COX5B,ATP5J,COA6,SLC25A13,STOML2
GO:BP	aromatic compound catabolic process	GO:0019439	0.0197012	1.70551	636	101	14	18123	PSMD13,RPS3A,RPS17,PSMD12,RPS9,RPS25,RPL31,RPL38,RPS21,YBX1,ENDOG,PSMD6,NT5C,SLIRP
GO:BP	myeloid cell activation involved in immune response	GO:0002275	0.0204504	1.6893	552	101	13	18123	PSMD13,DDOST,DDX3X,HLA-C,PDXK,PSMD12,CPNE3,S100A9,PYGB,LAMP2,LGALS3,PSMD6,CAND1
GO:BP	localization	GO:0051179	0.0227124	1.64374	6938	101	60	18123	PSMD13,SNX12,DDOST,DDX3X,HLA-C,PITRM1,YKT6,MTX2,RPS3A,PDXK,NOL3,RPS17,PSMD12,DNM1L,APOL1,CPNE3,ENDOD1,LETM1,IPO7,MT-CYB,MT-ATP6,S100A9,S100A6,DBI,HBQ1,COX5B,PYGB,SLC25A6,LAMP2,LGALS3,ATP5J,RAB5A,RYR1,KIF5B,GLRX,HMGCL,RPS9,CSE1L,PKIA,SNRPD2,RPS25,RPL31,RPL38,RPS21,YBX1,TRDN,CRYM,PSMD6,VAMP3,CAND1,ESYT1,TMED9,SLIRP,CUTC,CLIC5,UBQLN2,SLC25A13,STOML2,RAB21,TIMM13
GO:BP	myeloid leukocyte mediated immunity	GO:0002444	0.0229336	1.63953	558	101	13	18123	PSMD13,DDOST,DDX3X,HLA-C,PDXK,PSMD12,CPNE3,S100A9,PYGB,LAMP2,LGALS3,PSMD6,CAND1
GO:BP	small molecule metabolic process	GO:0044281	0.0234856	1.6292	1924	101	26	18123	PSMD13,ACY1,ADK,IDH3G,PDXK,PTGR1,COQ10A,PSMD12,APOL1,DDAH2,MT-ATP6,DBI,ATP5J,GLRX,HMGCL,GNPDA1,IDI1,CRYM,PSMD6,CBR4,NT5C,BDH2,PPA2,ABHD10,SLC25A13,STOML2
GO:BP	protein targeting	GO:0006605	0.0243995	1.61262	400	101	11	18123	PITRM1,RPS3A,RPS17,SLC25A6,LAMP2,RPS9,RPS25,RPL31,RPL38,RPS21,TIMM13
GO:BP	secretion by cell	GO:0032940	0.024742	1.60656	1351	101	21	18123	PSMD13,DDOST,DDX3X,HLA-C,YKT6,PDXK,PSMD12,DNM1L,CPNE3,ENDOD1,S100A9,PYGB,LAMP2,LGALS3,ATP5J,RAB5A,KIF5B,PSMD6,VAMP3,CAND1,RAB21
GO:BP	protein localization to endoplasmic reticulum	GO:0070972	0.0274761	1.56105	144	101	7	18123	RPS3A,RPS17,RPS9,RPS25,RPL31,RPL38,RPS21
GO:BP	cellular metabolic process	GO:0044237	0.0276692	1.558	10941	101	81	18123	PSMD13,SNX12,DDOST,DDX3X,ACY1,UROD,NDUFA6,ADK,YKT6,GPS1,RPS3A,IDH3G,PDXK,PTGR1,COQ10A,NOL3,RPS17,PFDN5,PSMD12,DNM1L,APOL1,CPNE3,ENDOD1,PGLS,IPO7,DDAH2,MT-CYB,MT-ATP6,S100A9,DBI,UQCRH,HBQ1,COX5B,PYGB,LAMP2,CAPN2,LGALS3,ATP5J,RAB5A,GLRX,HMGCL,PPIC,RPS9,GNPDA1,MTPN,HSPE1,PKIA,SNRPD2,RPS25,RPL31,RPL38,RPS21,YBX1,IDI1,ENDOG,GANAB,CRYM,PSMD6,VAMP3,COA6,FAHD1,HDDC2,ISCA2,CAND1,NIT1,CBR4,NT5C,MRRF,ESYT1,…
GO:BP	inner mitochondrial membrane organization	GO:0007007	0.0304116	1.51696	58	101	5	18123	MTX2,LETM1,MT-ATP6,ATP5J,TIMM13
GO:BP	translational initiation	GO:0006413	0.0308564	1.51066	203	101	8	18123	DDX3X,RPS3A,RPS17,RPS9,RPS25,RPL31,RPL38,RPS21
GO:BP	organic cyclic compound catabolic process	GO:1901361	0.0318789	1.4965	664	101	14	18123	PSMD13,RPS3A,RPS17,PSMD12,RPS9,RPS25,RPL31,RPL38,RPS21,YBX1,ENDOG,PSMD6,NT5C,SLIRP
GO:BP	cytoplasmic translation	GO:0002181	0.0342823	1.46493	149	101	7	18123	RPS3A,RPS17,RPS9,RPS25,RPL31,RPL38,RPS21
GO:BP	cellular amide metabolic process	GO:0043603	0.0399606	1.39837	1284	101	20	18123	DDX3X,RPS3A,RPS17,DBI,HMGCL,RPS9,GNPDA1,MTPN,RPS25,RPL31,RPL38,RPS21,YBX1,NIT1,CBR4,MRRF,BDH2,PPA2,CLIC5,COA3
GO:BP	protein localization to organelle	GO:0033365	0.0436633	1.35988	974	101	17	18123	DDX3X,PITRM1,RPS3A,RPS17,DNM1L,IPO7,SLC25A6,LAMP2,RPS9,CSE1L,PKIA,RPS25,RPL31,RPL38,RPS21,YBX1,TIMM13
GO:BP	cellular catabolic process	GO:0044248	0.0473124	1.32503	2381	101	29	18123	PSMD13,RPS3A,RPS17,PSMD12,DNM1L,DDAH2,S100A9,HBQ1,PYGB,LAMP2,CAPN2,RAB5A,HMGCL,RPS9,GNPDA1,RPS25,RPL31,RPL38,RPS21,YBX1,ENDOG,CRYM,PSMD6,NIT1,NT5C,BDH2,SLIRP,ABHD10,UBQLN2
GO:BP	export from cell	GO:0140352	0.0484385	1.31481	1413	101	21	18123	PSMD13,DDOST,DDX3X,HLA-C,YKT6,PDXK,PSMD12,DNM1L,CPNE3,ENDOD1,S100A9,PYGB,LAMP2,LGALS3,ATP5J,RAB5A,KIF5B,PSMD6,VAMP3,CAND1,RAB21
KEGG	Prion disease	KEGG:05020	2.79099e-05	4.55424	273	57	12	8000	PSMD13,NDUFA6,PSMD12,MT-CYB,MT-ATP6,UQCRH,COX5B,SLC25A6,ATP5J,RYR1,KIF5B,PSMD6
KEGG	Parkinson disease	KEGG:05012	8.78157e-05	4.05643	249	57	11	8000	PSMD13,NDUFA6,PSMD12,MT-CYB,MT-ATP6,UQCRH,COX5B,SLC25A6,ATP5J,KIF5B,PSMD6
KEGG	Pathways of neurodegeneration - multiple diseases	KEGG:05022	0.000321058	3.49342	475	57	14	8000	PSMD13,NDUFA6,PSMD12,MT-CYB,MT-ATP6,UQCRH,COX5B,SLC25A6,CAPN2,ATP5J,RAB5A,RYR1,KIF5B,PSMD6
KEGG	Amyotrophic lateral sclerosis	KEGG:05014	0.000560344	3.25155	363	57	12	8000	PSMD13,NDUFA6,PSMD12,MT-CYB,MT-ATP6,UQCRH,COX5B,ATP5J,RAB5A,KIF5B,PSMD6,UBQLN2
KEGG	Huntington disease	KEGG:05016	0.000650193	3.18696	306	57	11	8000	PSMD13,NDUFA6,PSMD12,MT-CYB,MT-ATP6,UQCRH,COX5B,SLC25A6,ATP5J,KIF5B,PSMD6
KEGG	Alzheimer disease	KEGG:05010	0.000662558	3.17878	369	57	12	8000	PSMD13,NDUFA6,PSMD12,MT-CYB,MT-ATP6,UQCRH,COX5B,SLC25A6,CAPN2,ATP5J,KIF5B,PSMD6
KEGG	Oxidative phosphorylation	KEGG:00190	0.0031472	2.50208	133	57	7	8000	NDUFA6,MT-CYB,MT-ATP6,UQCRH,COX5B,ATP5J,PPA2
KEGG	Ribosome	KEGG:03010	0.00767845	2.11473	153	57	7	8000	RPS3A,RPS17,RPS9,RPS25,RPL31,RPL38,RPS21
KEGG	Thermogenesis	KEGG:04714	0.0170448	1.76841	232	57	8	8000	NDUFA6,MT-CYB,MT-ATP6,UQCRH,COX5B,ATP5J,COA6,COA3
KEGG	Metabolic pathways	KEGG:01100	0.0258096	1.58822	1491	57	22	8000	DDOST,ACY1,UROD,NDUFA6,ADK,IDH3G,PDXK,PGLS,MT-CYB,MT-ATP6,UQCRH,COX5B,PYGB,ATP5J,HMGCL,GNPDA1,IDI1,GANAB,FAHD1,CBR4,NT5C,BDH2
KEGG	Diabetic cardiomyopathy	KEGG:05415	0.0437026	1.35949	203	57	7	8000	NDUFA6,MT-CYB,MT-ATP6,UQCRH,COX5B,SLC25A6,ATP5J
REAC	Metabolism	REAC:R-HSA-1430728	1.11948e-09	8.95098	2077	78	43	10622	PSMD13,ACY1,UROD,NDUFA6,ADK,RPS3A,IDH3G,PDXK,PTGR1,COQ10A,RPS17,PSMD12,CPNE3,PGLS,DDAH2,MT-CYB,MT-ATP6,DBI,UQCRH,COX5B,PYGB,ATP5J,RAB5A,GLRX,HMGCL,RPS9,GNPDA1,RPS25,RPL31,RPL38,RPS21,IDI1,CRYM,PSMD6,FAHD1,ISCA2,CBR4,NT5C,ESYT1,BDH2,PPA2,ABHD10,SLC25A13
REAC	Mitochondrial protein import	REAC:R-HSA-1268020	0.000165343	3.78161	65	78	7	10622	PITRM1,MTX2,IDH3G,SLC25A6,COA6,SLC25A13,TIMM13
REAC	Regulation of expression of SLITs and ROBOs	REAC:R-HSA-9010553	0.000167926	3.77488	171	78	10	10622	PSMD13,RPS3A,RPS17,PSMD12,RPS9,RPS25,RPL31,RPL38,RPS21,PSMD6
REAC	SRP-dependent cotranslational protein targeting to membrane	REAC:R-HSA-1799339	0.00061604	3.21039	113	78	8	10622	DDOST,RPS3A,RPS17,RPS9,RPS25,RPL31,RPL38,RPS21
REAC	Signaling by ROBO receptors	REAC:R-HSA-376176	0.00147027	2.8326	217	78	10	10622	PSMD13,RPS3A,RPS17,PSMD12,RPS9,RPS25,RPL31,RPL38,RPS21,PSMD6
REAC	Peptide chain elongation	REAC:R-HSA-156902	0.00153247	2.81461	90	78	7	10622	RPS3A,RPS17,RPS9,RPS25,RPL31,RPL38,RPS21
REAC	Viral mRNA Translation	REAC:R-HSA-192823	0.00153247	2.81461	90	78	7	10622	RPS3A,RPS17,RPS9,RPS25,RPL31,RPL38,RPS21
REAC	The citric acid (TCA) cycle and respiratory electron transport	REAC:R-HSA-1428517	0.00190948	2.71909	175	78	9	10622	NDUFA6,IDH3G,COQ10A,MT-CYB,MT-ATP6,UQCRH,COX5B,ATP5J,FAHD1
REAC	Selenocysteine synthesis	REAC:R-HSA-2408557	0.00205084	2.68807	94	78	7	10622	RPS3A,RPS17,RPS9,RPS25,RPL31,RPL38,RPS21
REAC	Eukaryotic Translation Termination	REAC:R-HSA-72764	0.00205084	2.68807	94	78	7	10622	RPS3A,RPS17,RPS9,RPS25,RPL31,RPL38,RPS21
REAC	Eukaryotic Translation Elongation	REAC:R-HSA-156842	0.00205084	2.68807	94	78	7	10622	RPS3A,RPS17,RPS9,RPS25,RPL31,RPL38,RPS21
REAC	Nonsense Mediated Decay (NMD) independent of the Exon Junction Complex (EJC)	REAC:R-HSA-975956	0.00236028	2.62704	96	78	7	10622	RPS3A,RPS17,RPS9,RPS25,RPL31,RPL38,RPS21
REAC	Formation of a pool of free 40S subunits	REAC:R-HSA-72689	0.00353051	2.45216	102	78	7	10622	RPS3A,RPS17,RPS9,RPS25,RPL31,RPL38,RPS21
REAC	Response of EIF2AK4 (GCN2) to amino acid deficiency	REAC:R-HSA-9633012	0.00353051	2.45216	102	78	7	10622	RPS3A,RPS17,RPS9,RPS25,RPL31,RPL38,RPS21
REAC	Metabolism of amino acids and derivatives	REAC:R-HSA-71291	0.00555387	2.2554	370	78	12	10622	PSMD13,RPS3A,RPS17,PSMD12,RPS9,RPS25,RPL31,RPL38,RPS21,CRYM,PSMD6,SLC25A13
REAC	Influenza Infection	REAC:R-HSA-168255	0.00560798	2.25119	152	78	8	10622	RPS3A,RPS17,SLC25A6,RPS9,RPS25,RPL31,RPL38,RPS21
REAC	L13a-mediated translational silencing of Ceruloplasmin expression	REAC:R-HSA-156827	0.00653183	2.18497	112	78	7	10622	RPS3A,RPS17,RPS9,RPS25,RPL31,RPL38,RPS21
REAC	GTP hydrolysis and joining of the 60S ribosomal subunit	REAC:R-HSA-72706	0.00692249	2.15974	113	78	7	10622	RPS3A,RPS17,RPS9,RPS25,RPL31,RPL38,RPS21
REAC	Protein localization	REAC:R-HSA-9609507	0.00743232	2.12888	158	78	8	10622	PITRM1,MTX2,IDH3G,SLC25A6,HMGCL,COA6,SLC25A13,TIMM13
REAC	Nonsense Mediated Decay (NMD) enhanced by the Exon Junction Complex (EJC)	REAC:R-HSA-975957	0.00821212	2.08554	116	78	7	10622	RPS3A,RPS17,RPS9,RPS25,RPL31,RPL38,RPS21
REAC	Nonsense-Mediated Decay (NMD)	REAC:R-HSA-927802	0.00821212	2.08554	116	78	7	10622	RPS3A,RPS17,RPS9,RPS25,RPL31,RPL38,RPS21
REAC	Selenoamino acid metabolism	REAC:R-HSA-2408522	0.00868368	2.0613	117	78	7	10622	RPS3A,RPS17,RPS9,RPS25,RPL31,RPL38,RPS21
REAC	Cap-dependent Translation Initiation	REAC:R-HSA-72737	0.0102344	1.98994	120	78	7	10622	RPS3A,RPS17,RPS9,RPS25,RPL31,RPL38,RPS21
REAC	Eukaryotic Translation Initiation	REAC:R-HSA-72613	0.0102344	1.98994	120	78	7	10622	RPS3A,RPS17,RPS9,RPS25,RPL31,RPL38,RPS21
REAC	Respiratory electron transport, ATP synthesis by chemiosmotic coupling, and heat production by uncoupling proteins.	REAC:R-HSA-163200	0.0133228	1.87541	125	78	7	10622	NDUFA6,COQ10A,MT-CYB,MT-ATP6,UQCRH,COX5B,ATP5J
REAC	Formation of the ternary complex, and subsequently, the 43S complex	REAC:R-HSA-72695	0.0142073	1.84749	52	78	5	10622	RPS3A,RPS17,RPS9,RPS25,RPS21
REAC	Neutrophil degranulation	REAC:R-HSA-6798695	0.0145489	1.83717	476	78	13	10622	PSMD13,DDOST,DDX3X,HLA-C,PDXK,PSMD12,CPNE3,S100A9,PYGB,LAMP2,LGALS3,PSMD6,CAND1
REAC	Translation	REAC:R-HSA-72766	0.0194374	1.71136	292	78	10	10622	DDOST,RPS3A,RPS17,RPS9,RPS25,RPL31,RPL38,RPS21,MRRF,PPA2
REAC	Influenza Viral RNA Transcription and Replication	REAC:R-HSA-168273	0.0198325	1.70262	133	78	7	10622	RPS3A,RPS17,RPS9,RPS25,RPL31,RPL38,RPS21
REAC	Ribosomal scanning and start codon recognition	REAC:R-HSA-72702	0.0262934	1.58015	59	78	5	10622	RPS3A,RPS17,RPS9,RPS25,RPS21
REAC	Translation initiation complex formation	REAC:R-HSA-72649	0.0262934	1.58015	59	78	5	10622	RPS3A,RPS17,RPS9,RPS25,RPS21
REAC	Activation of the mRNA upon binding of the cap-binding complex and eIFs, and subsequent binding to 43S	REAC:R-HSA-72662	0.0285202	1.54485	60	78	5	10622	RPS3A,RPS17,RPS9,RPS25,RPS21

## Sheet: REAC
	Term	intersections	adjusted_p_value	negative_log10_of_adjusted_p_value
REAC	Metabolism	PSMD13,RPS3A,RPS17,PSMD12,RPS9,RPS25,RPL31,RPL38,RPS21,CRYM,PSMD6,SLC25A13	1.11948e-09	-8.95098
REAC	Mitochondrial protein import	PITRM1,MTX2,IDH3G,SLC25A6,COA6,SLC25A13,TIMM13	0.000165343	-3.78161
REAC	Regulation of expression of SLITs and ROBOs	PSMD13,RPS3A,RPS17,PSMD12,RPS9,RPS25,RPL31,RPL38,RPS21,PSMD6	0.000167926	-3.77488
REAC	Signaling by ROBO receptors	PSMD13,RPS3A,RPS17,PSMD12,RPS9,RPS25,RPL31,RPL38,RPS21,PSMD6	0.00147027	-2.8326
REAC	The citric acid (TCA) cycle and respiratory electron transport	NDUFA6,IDH3G,COQ10A,MT-CYB,MT-ATP6,UQCRH,COX5B,ATP5J,FAHD1	0.00190948	-2.71909
REAC	Selenocysteine synthesis	RPS3A,RPS17,RPS9,RPS25,RPL31,RPL38,RPS21	0.00205084	-2.68807

## Sheet: KEGG
	Term name	intersections	adjusted_p_value	negative_log10_of_adjusted_p_value
KEGG	Parkinson disease	PSMD13,NDUFA6,PSMD12,MT-CYB,MT-ATP6,UQCRH,COX5B,SLC25A6,ATP5J,KIF5B,PSMD6	8.78157e-05	-4.05643
KEGG	Pathways of neurodegeneration diseases	PSMD13,NDUFA6,PSMD12,MT-CYB,MT-ATP6,UQCRH,COX5B,SLC25A6,CAPN2,ATP5J,RAB5A,RYR1,KIF5B,PSMD6	0.000321058	-3.49342
KEGG	Amyotrophic lateral sclerosis	PSMD13,NDUFA6,PSMD12,MT-CYB,MT-ATP6,UQCRH,COX5B,ATP5J,RAB5A,KIF5B,PSMD6,UBQLN2	0.000560344	-3.25155
KEGG	Oxidative phosphorylation	NDUFA6,MT-CYB,MT-ATP6,UQCRH,COX5B,ATP5J,PPA2	0.0031472	-2.50208
KEGG	Metabolic pathways	DDOST,ACY1,UROD,NDUFA6,ADK,IDH3G,PDXK,PGLS,MT-CYB,MT-ATP6,UQCRH,COX5B,PYGB,ATP5J,HMGCL,GNPDA1,IDI1,GANAB,FAHD1,CBR4,NT5C,BDH2	0.0258096	-1.58822
KEGG	Diabetic cardiomyopathy	NDUFA6,MT-CYB,MT-ATP6,UQCRH,COX5B,SLC25A6,ATP5J	0.0437026	-1.35949

## Sheet: BP
	term_name	intersections	adjusted_p_value	negative_log10_of_adjusted_p_value
GO:BP	cellular respiration	NDUFA6,IDH3G,COQ10A,MT-CYB,MT-ATP6,UQCRH,COX5B,ATP5J,COA6,FAHD1,SLC25A13,STOML2	1.60505e-05	-4.79451
GO:BP	aerobic respiration	NDUFA6,IDH3G,MT-CYB,MT-ATP6,UQCRH,COX5B,ATP5J,COA6,FAHD1,STOML2	0.000296363	-3.52818
GO:BP	exocytosis	PSMD13,DDOST,DDX3X,HLA-C,YKT6,PDXK,PSMD12,DNM1L,CPNE3,ENDOD1,S100A9,PYGB,LAMP2,LGALS3,RAB5A,PSMD6,VAMP3,CAND1,RAB21	0.000908028	-3.0419
GO:BP	mitochondrion organization	NDUFA6,PITRM1,UQCC1,MTX2,NOL3,DNM1L,LETM1,MT-ATP6,SLC25A6,ATP5J,HMGCL,SLIRP,STOML2,COA3,TIMM13	0.00091832	-3.03701
GO:BP	intracellular transport	SNX12,PITRM1,YKT6,RPS3A,RPS17,DNM1L,IPO7,MT-ATP6,SLC25A6,LAMP2,ATP5J,RAB5A,KIF5B,RPS9,CSE1L,PKIA,SNRPD2,RPS25,RPL31,RPL38,RPS21,VAMP3,TMED9,STOML2,RAB21,TIMM13	0.00313448	-2.50383
GO:BP	ATP metabolic process	NDUFA6,DNM1L,MT-CYB,MT-ATP6,UQCRH,COX5B,ATP5J,COA6,SLC25A13,STOML2	0.0188826	-1.72394
GO:BP	cellular metabolic process	PSMD13,SNX12,DDOST,DDX3X,ACY1,UROD,NDUFA6,ADK,YKT6,GPS1,RPS3A,IDH3G,PDXK,PTGR1,COQ10A,NOL3,RPS17,PFDN5,PSMD12,DNM1L,APOL1,CPNE3,ENDOD1,PGLS,IPO7,DDAH2,MT-CYB,MT-ATP6,S100A9,DBI,UQCRH,HBQ1,COX5B,PYGB,LAMP2,CAPN2,LGALS3,ATP5J,RAB5A,GLRX,HMGCL,PPIC,RPS9,GNPDA1,MTPN,HSPE1,PKIA,SNRPD2,RPS25,RPL31,RPL38,RPS21,YBX1,IDI1,ENDOG,GANAB,CRYM,PSMD6,VAMP3,COA6,FAHD1,HDDC2,ISCA2,CAND1,NIT1,CBR4,NT5C,MRRF,ESYT1,…	0.0276692	-1.558
